# Supplementary material for: Besançon 2012 : Deux belges, un autrichien, un russe et un japonais pour la « tournée des lauréats »
Source: Royal Society of Chemistry journal article supplement (doi:10.1039/c5ra25809j), 2012-09-16
Supplement: c5ra25809j1.pdf [file c5ra25809j1.pdf]

## SUPPLEMENTARY MATERIAL

### **Solid phase synthesis and RNA-binding activity of an arginine-containing nucleopeptide**

G. N. Roviello<sup>1\*</sup>, C. Vicidomini<sup>1</sup>, S. Di Gaetano<sup>1</sup>, D. Capasso<sup>2</sup>, D. Musumeci<sup>1,3</sup> and V. Roviello<sup>4</sup>

<sup>1</sup>CNR, Istituto di Biostrutture e Bioimmagini – (Mezzacannone site and Headquarters), 80134 Napoli, Italy.

<sup>2</sup>Università di Napoli “Federico II”, Dipartimento di Farmacia, 80134 Napoli, Italy.

<sup>3</sup>Università di Napoli “Federico II”, Dipartimento di Scienze Chimiche, 80126 Napoli, Italy;

<sup>4</sup>Università di Napoli “Federico II”, Dipartimento di Ingegneria Chimica, dei Materiali e della Produzione Industriale (DICMaPI), 80125 Napoli, Italy;

\*Email: [giovanni.roviello@cnr.it](mailto:giovanni.roviello@cnr.it) ; Fax: +39-(0)81-2534574; Tel: +39-(0)81-2534585.

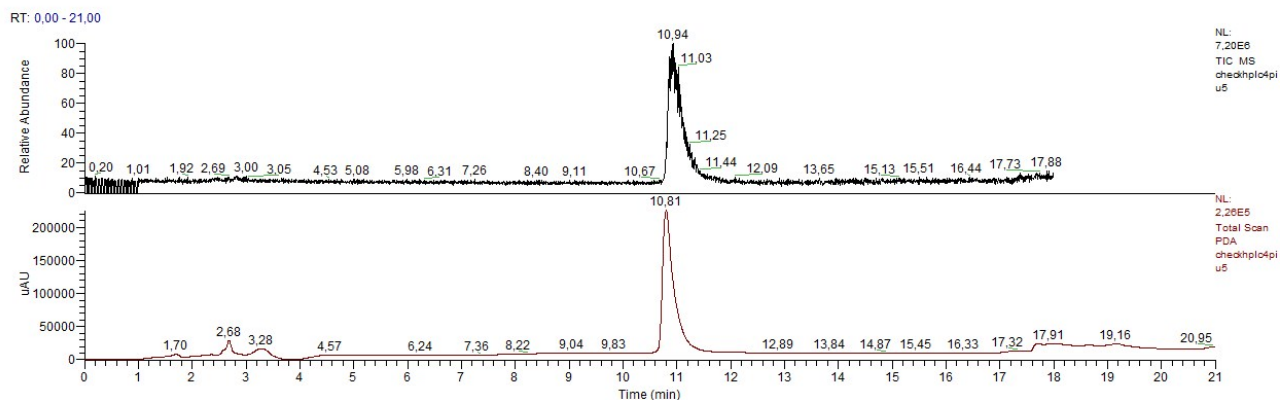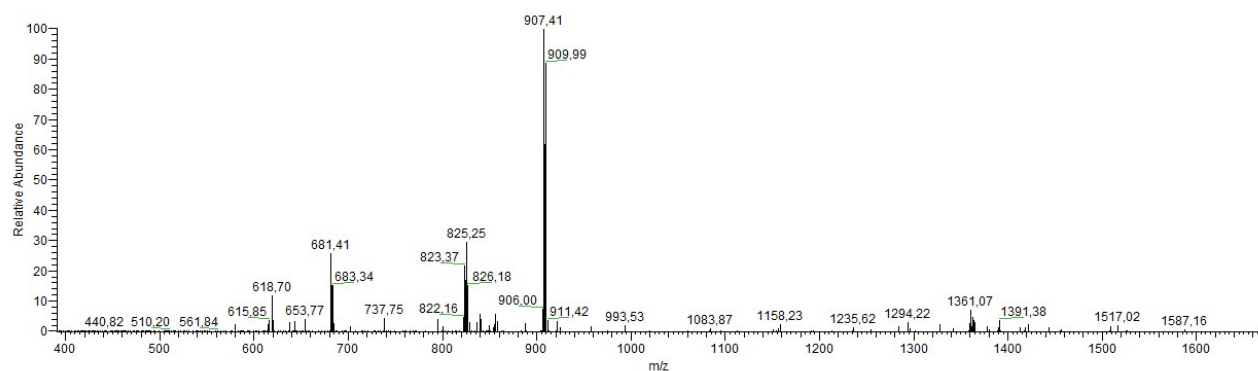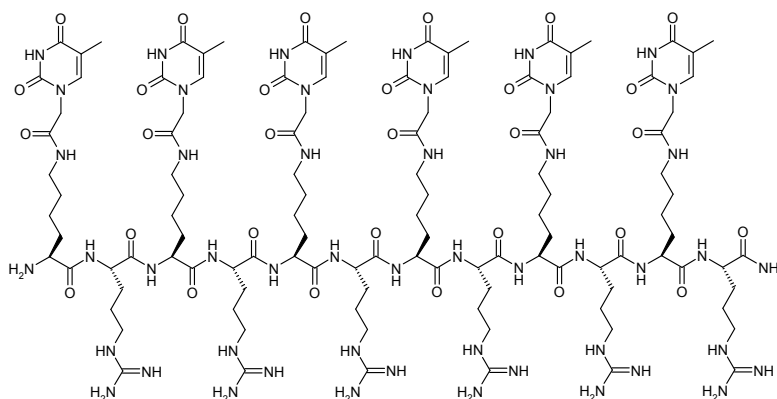

Molecular Weight = 2720.04  
 Exact Mass = 2717  
 Molecular Formula = C<sub>114</sub>H<sub>183</sub>N<sub>49</sub>O<sub>30</sub>  
 Molecular Composition = C 50.34% H 6.78% N 25.23% O 17.65%

(M+2H)<sup>++</sup> 1361.03  
 (M+3H)<sup>+++</sup> 907.69  
 (M+4H)<sup>++++</sup> 681.02

**Figure S1:** LC-ESIMS (positive ions) analysis of nucleopeptide **1**; Method: 5% (5min) to 40% B in A over 10 min. A = H<sub>2</sub>O (0.05% TFA); B = CH<sub>3</sub>CN (0.05% TFA).

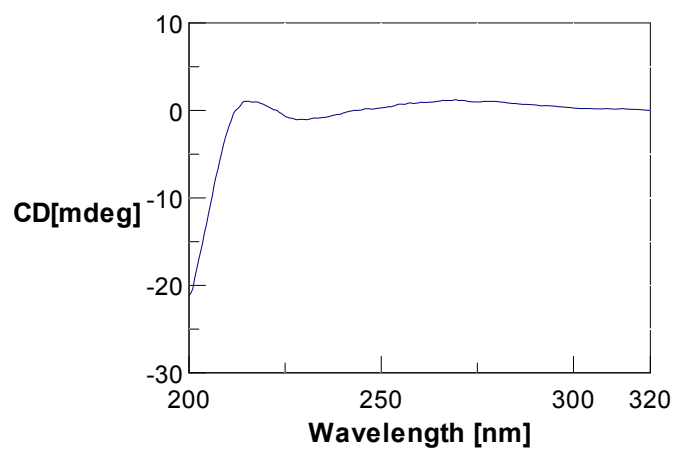

**Figure S2:** CD profile relative to a 2  $\mu\text{M}$  solution of nucleopeptide **1** in 5 mM phosphate buffer, pH 7.5, at 15  $^{\circ}\text{C}$ .

## CD-titration of dA<sub>12</sub> with nucleopeptide 1

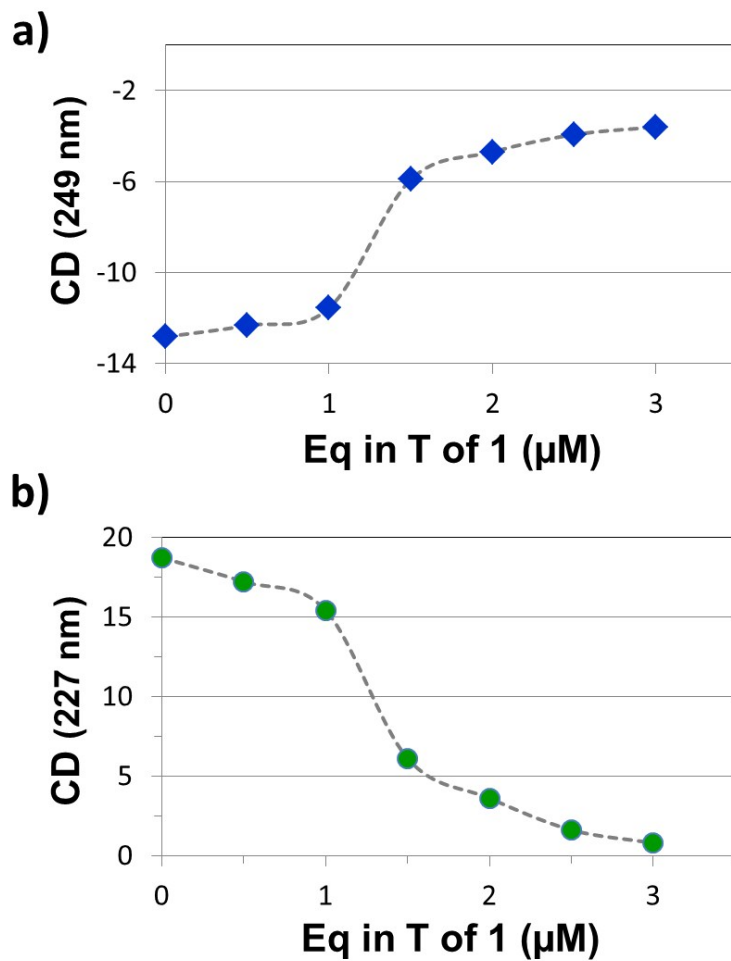

**Figure S3:** CD titration of dA<sub>12</sub> (4 μM in A) with oligomer 1 at different equivalents of T nucleobase: the CD values of the negative and positive bands at, respectively, 249 (a) and 227 nm (b) as a function of the amount of nucleopeptide added were reported.
